# Supplementary material
Source: PubMed Central journal article supplement (PMC4550807)

Figure S1. Effects of contusion injury on muscle degeneration and regeneration. (a–g) Haematoxylin and eosin staining of 4  $\mu\text{m}$  sections of control (a) and injured gastrocnemius muscle at different times after contusion: 3 h (b), 6 h (c), 12 h (d), 1 day (e), 3 days (f) and 7 days (g).

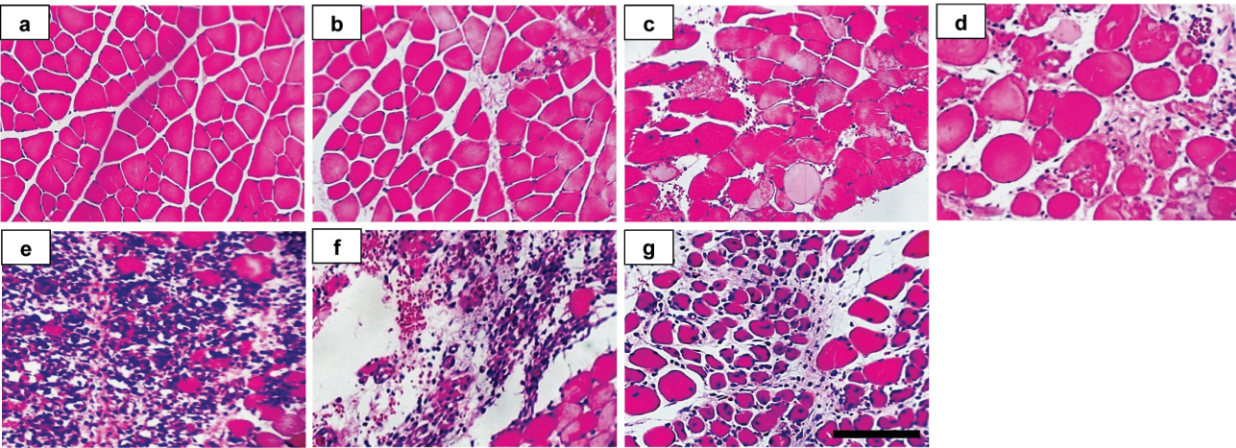

Supplement: NIHMS716290-supplement-Supplemental_figure_1.pdf [file NIHMS716290-supplement-Supplemental_figure_1.pdf]
